# Supplementary material
Source: publisher site journal article supplement (https://www.dovepress.com/article/376546)
Supplement: Supplementary file 1 [file get_supplementary_file.php]

**Supplementary Appendix**

**Table S1** Correlations between main demographics, disease history, environmental exposure, and immune and inflammatory levels

|  | Age | BMI | Level of income | Level of education | Smoking status | Indoor fuel use | Outdoor straw burning | History of RD | Histoty of CHD/CHF | Histoty of CVD | IgG | IgA | C3 | C32 | CRP |
| --- | --- | --- | --- | --- | --- | --- | --- | --- | --- | --- | --- | --- | --- | --- | --- |
| Age | 1.0000 |  |  |  |  |  |  |  |  |  |  |  |  |  |  |
| BMI | -0.1289** | 1.0000 |  |  |  |  |  |  |  |  |  |  |  |  |  |
| Level of income | -0.2598** | 0.0604 | 1.0000 |  |  |  |  |  |  |  |  |  |  |  |  |
| Level of education | -0.1761** | 0.0204 | 0.2163** | 1.0000 |  |  |  |  |  |  |  |  |  |  |  |
| Smoking status | 0.1582** | -0.1661** | -0.0986** | -0.0804* | 1.0000 |  |  |  |  |  |  |  |  |  |  |
| Indoor fuel use | 0.1659 ** | -0.0678* | -0.2074** | -0.1310** | -0.0300 | 1.0000 |  |  |  |  |  |  |  |  |  |
| Straw burning outdoor | 0.0441 | -0.0010 | -0.0786* | 0.0086 | 0.0149 | 0.2030** | 1.0000 |  |  |  |  |  |  |  |  |
| Histoty of RD | 0.1058 ** | -0.1157** | -0.0504 | -0.0814* | 0.1454** | 0.0925** | 0.0148 | 1.0000 |  |  |  |  |  |  |  |
| Histoty of CHD/CHF | 0.2028** | -0.0047 | -0.0995** | -0.1161** | 0.02323 | 0.0352 | -0.0179 | 0.1556** | 1.0000 |  |  |  |  |  |  |
| Histoty of CVD | 0.1906 ** | 0.1115** | -0.0985** | -0.0571 | -0.00021 | 0.0969** | 0.0462 | 0.0340 | 0.1515** | 1.0000 |  |  |  |  |  |
| IgG | -0.0003 | 0.0481 | 0.0407 | 0.0121 | -0.21387** | -0.0152 | -0.0067 | -0.0682* | 0.0124 | -0.0338 | 1.0000 |  |  |  |  |
| IgA | 0.0273 | 0.0718** | 0.0343 | -0.0001 | -0.10057** | -0.0097 | 0.0103 | -0.0269 | 0.0372 | 0.0114 | 0.3750** | 1.0000 |  |  |  |
| C3 | -0.0067 | 0.2608** | 0.0108 | -0.0195 | -0.10146** | -0.0533 | 0.0269 | -0.0344 | 0.1146** | 0.0578 | 0.2776** | 0.1649** | 1.0000 |  |  |
| C32 | -0.0047 | 0.2533** | 0.0062 | -0.0140 | -0.08991** | -0.0605 | 0.0234 | -0.0288 | 0.1163** | 0.0502 | 0.2703** | 0.1594** | 0.9893** | 1.0000 |  |
| CRP | 0.1746 ** | 0.1209** | -0.0254 | -0.0440 | 0.08513* | 0.0224 | 0.0411 | 0.0426 | 0.0743* | 0.0401 | 0.0791* | 0.1099** | 0.4390** | 0.4455** | 1.0000 |

**Notes:** * *P-value*<0.05; ***P-value*<0.01.

**Abbreviations:** BMI, body mass index; RD, respiratory disease; CHD/CHF, coronary heart disease and congestive heart failure; CVD, cerebrovascular disease; IgG, Immunoglobulin G; IgM, Immunoglobulin M; IgA, Immunoglobulin A; C3, the third complement component; C4, the fourth complement component; CRP, C-reactive protein.

**Table S2** Collinearity diagnosis of the main demographics, disease history, environmental exposure, and immune and inflammatory levels

| Dimension | Eigenvalues | Condition index | Variance Proportions | | | | | | | | | | | | | | | |
| --- | --- | --- | --- | --- | --- | --- | --- | --- | --- | --- | --- | --- | --- | --- | --- | --- | --- | --- |
| Intercept | Age | BMI | Level of education | Level of income | Smoking status | RD | Indoor fuel use | Outdoor straw burning | CHD/CHF | CVD | IgG | IgA | C3 | C32 | CRP |
| 1 | 11.9380 | 1.0000 | 0.0000 | 0.0001 | 0.0010 | 0.0014 | 0.0010 | 0.0006 | 0.0010 | 0.0001 | 0.0014 | 0.0014 | 0.0012 | 0.0003 | 0.0008 | 0.0000 | 0.0000 | 0.0013 |
| 2 | 0.9578 | 3.5304 | 0.0000 | 0.0000 | 0.0016 | 0.0090 | 0.0034 | 0.0000 | 0.3477 | 0.0000 | 0.0009 | 0.2197 | 0.1439 | 0.0003 | 0.0008 | 0.0000 | 0.0000 | 0.0002 |
| 3 | 0.7939 | 3.8779 | 0.0000 | 0.0000 | 0.0009 | 0.0005 | 0.0009 | 0.0005 | 0.4060 | 0.0000 | 0.0000 | 0.0191 | 0.5175 | 0.0000 | 0.0000 | 0.0000 | 0.0000 | 0.0000 |
| 4 | 0.6371 | 4.3286 | 0.0000 | 0.0000 | 0.0000 | 0.0019 | 0.0001 | 0.0001 | 0.1670 | 0.0000 | 0.0017 | 0.6611 | 0.2710 | 0.0000 | 0.0001 | 0.0000 | 0.0000 | 0.0004 |
| 5 | 0.3766 | 5.6302 | 0.0000 | 0.0000 | 0.0020 | 0.2062 | 0.0295 | 0.0001 | 0.0001 | 0.0002 | 0.0032 | 0.0329 | 0.0028 | 0.0001 | 0.0000 | 0.0000 | 0.0005 | 0.3865 |
| 6 | 0.3025 | 6.2820 | 0.0000 | 0.0003 | 0.0067 | 0.1316 | 0.0417 | 0.0038 | 0.0100 | 0.0006 | 0.6102 | 0.0004 | 0.0075 | 0.0000 | 0.0001 | 0.0000 | 0.0001 | 0.0411 |
| 7 | 0.2487 | 6.9282 | 0.0001 | 0.0005 | 0.0451 | 0.4759 | 0.0218 | 0.0013 | 0.0001 | 0.0005 | 0.1341 | 0.0152 | 0.0003 | 0.0072 | 0.0445 | 0.0000 | 0.0000 | 0.2203 |
| 8 | 0.1833 | 8.0714 | 0.0001 | 0.0026 | 0.5596 | 0.0039 | 0.0004 | 0.0967 | 0.0403 | 0.0012 | 0.0768 | 0.0056 | 0.0065 | 0.0031 | 0.0343 | 0.0000 | 0.0004 | 0.0144 |
| 9 | 0.1700 | 8.3796 | 0.0000 | 0.0001 | 0.0048 | 0.1138 | 0.6498 | 0.0088 | 0.0066 | 0.0001 | 0.0338 | 0.0066 | 0.0035 | 0.0102 | 0.1337 | 0.0000 | 0.0004 | 0.0429 |
| 10 | 0.1515 | 8.8774 | 0.0003 | 0.0031 | 0.0841 | 0.0010 | 0.1230 | 0.2030 | 0.0137 | 0.0023 | 0.0718 | 0.0021 | 0.0084 | 0.0076 | 0.3070 | 0.0000 | 0.0000 | 0.0182 |
| 11 | 0.1131 | 10.2722 | 0.0000 | 0.0000 | 0.2216 | 0.0031 | 0.0019 | 0.0374 | 0.0012 | 0.0000 | 0.0004 | 0.0106 | 0.0019 | 0.0085 | 0.1782 | 0.0009 | 0.0119 | 0.1580 |
| 12 | 0.0671 | 13.3412 | 0.0016 | 0.0211 | 0.0031 | 0.0109 | 0.0146 | 0.3429 | 0.0000 | 0.0311 | 0.0267 | 0.0005 | 0.0013 | 0.1629 | 0.2221 | 0.0001 | 0.0061 | 0.0735 |
| 13 | 0.0398 | 17.3224 | 0.0022 | 0.0337 | 0.0184 | 0.0015 | 0.0000 | 0.2022 | 0.0021 | 0.0691 | 0.0235 | 0.0032 | 0.0120 | 0.7572 | 0.0777 | 0.0003 | 0.0001 | 0.0030 |
| 14 | 0.0147 | 28.5312 | 0.0001 | 0.5778 | 0.0014 | 0.0003 | 0.0006 | 0.0327 | 0.0011 | 0.5095 | 0.0120 | 0.0169 | 0.0056 | 0.0057 | 0.0000 | 0.0000 | 0.0000 | 0.0113 |
| 15 | 0.0054 | 47.1114 | 0.2532 | 0.3542 | 0.0496 | 0.0329 | 0.1113 | 0.0590 | 0.0018 | 0.3846 | 0.0026 | 0.0047 | 0.0136 | 0.0368 | 0.0007 | 0.0156 | 0.0239 | 0.0281 |
| 16 | 0.0006 | 146.5395 | 0.7424 | 0.0065 | 0.0002 | 0.0061 | 0.0000 | 0.0108 | 0.0013 | 0.0007 | 0.0010 | 0.0002 | 0.0030 | 0.0000 | 0.0002 | 0.9830 | 0.9565 | 0.0008 |

**Abbreviations:** BMI, body mass index; RD, respiratory disease; CHD/CHF, coronary heart disease and congestive heart failure; CVD, cerebrovascular disease; IgG, Immunoglobulin G; IgM, Immunoglobulin M; IgA, Immunoglobulin A; C3, the third complement component; C4, the fourth complement component; CRP, C-reactive protein.

**Table S3** Variance expansion factors for main demographics, disease history, environmental exposure, and immune and inflammatory levels

| Characteristics | Tolerance | VIF |
| --- | --- | --- |
| Age | 0.80210 | 1.24673 |
| BMI | 0.86808 | 1.15196 |
| Level of education | 0.92955 | 1.07578 |
| Level of income | 0.87747 | 1.13964 |
| Smoking status | 0.86809 | 1.15196 |
| Indoor fuel use | 0.88541 | 1.12942 |
| Outdoor straw burning | 0.94580 | 1.05731 |
| History of RD | 0.93489 | 1.06964 |
| History of CHD/CHF | 0.90451 | 1.10558 |
| History of CVD | 0.92421 | 1.08200 |
| IgG | 0.73388 | 1.36263 |
| IgA | 0.79221 | 1.26230 |
| C3 | 0.02102 | 47.56484 |
| C32 | 0.02114 | 47.30049 |
| CRP | 0.74076 | 1. 34997 |

**Abbreviations:** BMI, body mass index; RD, respiratory disease; CHD/CHF, coronary heart disease and congestive heart failure; CVD, cerebrovascular disease; IgG, Immunoglobulin G; IgM, Immunoglobulin M; IgA, Immunoglobulin A; C3, the third complement component; C4, the fourth complement component; CRP, C-reactive protein.

**Table S4** Results of the principal component eigenvectors

| Characteristics | PRIN 1 | PRIN 2 | PRIN 3 | PRIN 4 | PRIN 5 | PRIN 6 | PRIN 7 | PRIN 8 | PRIN 9 | PRIN 10 | PRIN 11 | PRIN 12 | PRIN 13 | PRIN 14 | PRIN 15 |
| --- | --- | --- | --- | --- | --- | --- | --- | --- | --- | --- | --- | --- | --- | --- | --- |
| Age | 0.027214 | 0.478783 | 0.123318 | -0.130794 | -0.025612 | 0.014948 | 0.38314 | -0.079869 | -0.079555 | 0.207757 | 0.29926 | -0.438389 | 0.439643 | -0.243182 | -0.000311 |
| BMI | 0.251467 | -0.157572 | -0.116442 | 0.293821 | -0.390444 | -0.116585 | -0.081399 | 0.469263 | 0.100235 | -0.215306 | 0.531712 | 0.056784 | 0.267725 | 0.071655 | 0.004061 |
| Level of education | -0.021302 | -0.307162 | -0.071777 | 0.127541 | 0.048207 | 0.616078 | 0.333769 | -0.399177 | -0.165334 | -0.35755 | 0.25053 | 0.09231 | 0.06763 | -0.009578 | -0.005406 |
| Level of income | 0.014056 | -0.395492 | -0.168252 | -0.125457 | -0.035455 | 0.422752 | -0.020288 | 0.256061 | 0.071466 | 0.705515 | -0.075174 | 0.019064 | 0.19982 | -0.067541 | 0.004664 |
| Smoking status | -0.122424 | 0.284642 | -0.357107 | -0.183855 | 0.353433 | 0.004967 | 0.334376 | 0.307259 | 0.151364 | -0.146669 | -0.079961 | 0.535899 | 0.258486 | 0.081515 | -0.006603 |
| Indoor fuel use | -0.038023 | 0.304162 | 0.328747 | 0.406755 | 0.090743 | 0.110378 | -0.282437 | -0.083767 | -0.39518 | 0.289186 | 0.144848 | 0.496015 | 0.133694 | 0.024384 | 0.005856 |
| Outdoor straw burning | 0.012752 | 0.166173 | 0.190487 | 0.553862 | 0.287031 | 0.291615 | 0.00165 | 0.126206 | 0.611859 | -0.030178 | -0.144408 | -0.219975 | -0.035523 | 0.004814 | 0.003128 |
| History of RD | -0.061462 | 0.269549 | -0.111176 | -0.27863 | 0.091003 | 0.466703 | -0.556744 | 0.300467 | -0.216224 | -0.308747 | -0.010514 | -0.250164 | 0.030845 | -0.038674 | -0.004063 |
| History of CHD/CHF | 0.092615 | 0.300853 | 0.005967 | -0.331789 | -0.391963 | 0.206715 | -0.178991 | -0.34454 | 0.521684 | 0.099094 | 0.228128 | 0.278076 | -0.134843 | 0.118968 | 0.000062 |
| History of CVD | 0.060024 | 0.255091 | 0.037796 | 0.147123 | -0.608995 | 0.237035 | 0.340668 | 0.221494 | -0.203784 | -0.051223 | -0.493056 | 0.036889 | -0.138664 | 0.090637 | 0.00427 |
| IgG | 0.289167 | -0.141269 | 0.505679 | -0.266794 | 0.114166 | 0.031635 | 0.035389 | 0.030115 | 0.004587 | -0.087065 | -0.14311 | -0.038811 | 0.346938 | 0.635126 | 0.001599 |
| IgA | 0.236327 | -0.095939 | 0.526725 | -0.268959 | 0.106089 | 0.084801 | 0.174397 | 0.324254 | 0.031846 | -0.089917 | 0.127268 | 0.217521 | -0.326722 | -0.501796 | 0.002609 |
| C3 | 0.564765 | 0.035231 | -0.176723 | 0.052845 | 0.062145 | -0.020187 | -0.097957 | -0.161115 | -0.019615 | -0.027601 | -0.204342 | 0.047489 | 0.135738 | -0.202608 | -0.70804 |
| C32 | 0.562524 | 0.037274 | -0.187439 | 0.044721 | 0.070713 | -0.018761 | -0.094908 | -0.166577 | -0.020738 | -0.0377 | -0.203141 | 0.046771 | 0.135386 | -0.202053 | 0.706029 |
| CRP | 0.357713 | 0.184375 | -0.229234 | 0.029435 | 0.248674 | 0.070605 | 0.186701 | 0.115533 | -0.188273 | 0.230694 | 0.310039 | -0.139875 | -0.549869 | 0.403594 | -0.001933 |

**Abbreviations:** BMI, body mass index; RD, respiratory disease; CHD/CHF, coronary heart disease and congestive heart failure; CVD, cerebrovascular disease; IgG, Immunoglobulin G; IgA, Immunoglobulin A; C3, the third complement component; CRP, C-reactive protein.
